# Supplementary material for: Identification and characterization of cold-responsive aquaporins from the larvae of a crambid pest Agriphila aeneociliella (Eversmann) (Lepidoptera: Crambidae)
Source: PeerJ. 2023 Nov 13;11:e16403. doi: 10.7717/peerj.16403 (PMC10652857; doi:10.7717/peerj.16403)
Supplement: Supplemental Information 3 [file peerj-11-16403-s003.xls]

## Sheet: Sheet1
	Sample	β-actin	AQP1	AQP2	AQP3	AQP4	AQP5	AQP6
Control	Ck-1	17.33	29.17	29.83	29.2	29.64	29.31	29.82
	Ck-1	17.51	29.61	29.92	29.63	29.77	29.27	29.62
	Ck-1	17.62	29.56	29.94	29.17	29.67	29.3	29.66
1-3	1	17.19	27.54	27.97	28.29	30.96	28.45	31.69
	2	17.25	27.95	27.73	28.15	30.96	27.95	31.23
	3	17.5	27.57	27.72	27.8	30.49	27.95	31.25
1-12	1	17.32	28.31	29.74	28.42	32.33	27.47	32.2
	2	17.6	28.26	29.89	28.07	32.6	27.83	32.54
	3	17.63	28.03	29.88	28.28	32.51	27.75	32.27
1-24	1	17.53	28.89	30.52	28.76	33.8	27.98	32.8
	2	17.55	29.1	30.17	28.37	33.83	27.87	32.72
	3	17.8	28.72	30.22	28.4	33.72	27.58	32.42
2-3	1	17.49	28.82	29.92	29.73	32	27.95	31.8
	2	17.83	28.29	29.78	29.72	32.43	27.8	32.2
	3	18.01	28.88	29.84	29.93	32.12	28.27	31.98
2-12	1	17.29	28.93	27.62	30.45	33.84	29.35	31.98
	2	17.76	29.01	28.1	30.48	33.97	29.54	32.22
	3	17.64	29	27.9	30.09	34.1	29.75	32.39
2-24	1	17.69	29.44	27.92	31.06	33.5	29.72	30.67
	2	17.48	29.69	28.23	31.25	33.24	29.79	31.02
	3	17.29	29.83	27.8	31	33.46	29.89	30.62
3-3	1	17.82	28.78	32	31.4	31.85	28.38	32.52
	2	17.38	28.8	31.89	30.61	31.6	28.17	32.3
	3	17.5	28.78	31.5	30.57	31.61	28.18	32.49
3-12	1	17.51	28.46	30.8	28.42	30.32	29.82	32.35
	2	17.63	28.58	30.92	28.81	30.34	29.84	32.2
	3	17.82	28.56	31.07	28.64	30.21	29.6	32.26
3-24	1	17.6	27.99	32	28.26	28.58	29.67	31.1
	2	17.72	28.18	31.82	27.87	28.7	29.62	30.98
	3	17.95	28.08	31.99	27.92	28.8	29.84	31
4-3	1	17.41	28.65	31	29.52	30.71	29.15	32.5
	2	17.32	28.44	31.1	29.57	30.8	29.17	32.2
	3	17.81	28.16	31.3	29.4	30.48	29.19	32.18
4-12	1	17.77	27.15	31.9	29.17	29.71	27.46	31.56
	2	17.47	27.58	32.4	29.65	30.15	27.59	31.85
	3	17.62	26.92	32	29.45	30.15	27.64	31.55
4-24	1	17.4	26.65	29	28.15	31.38	28.03	30.1
	2	17.35	27.19	29.5	27.96	31.39	27.89	29.97
	3	17.72	26.96	29.47	27.93	31.41	28.04	30.2
