# Supplementary material for: Identification and characterization of cold-responsive aquaporins from the larvae of a crambid pest Agriphila aeneociliella (Eversmann) (Lepidoptera: Crambidae)
Source: PeerJ journal article supplement (doi:10.7717/peerj.16403), 2023-11-13

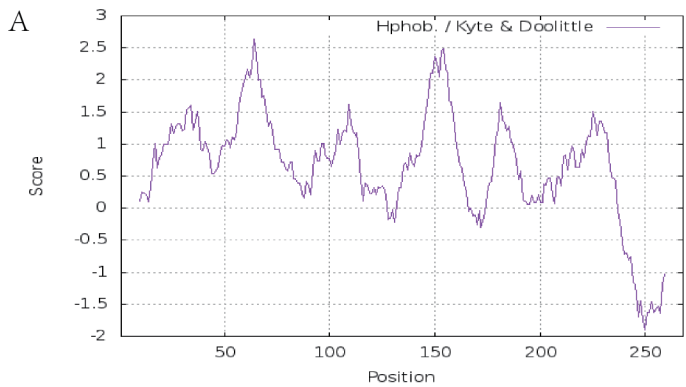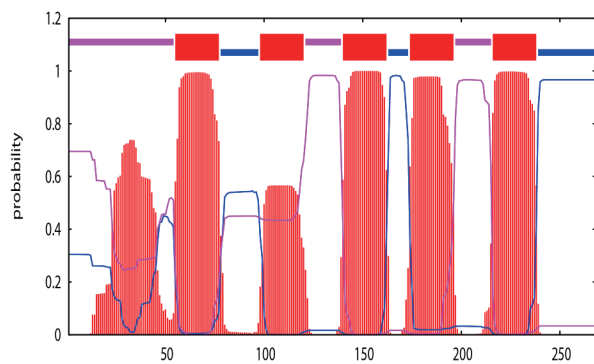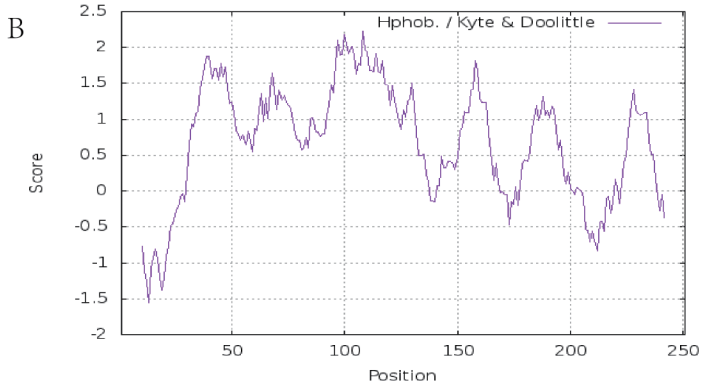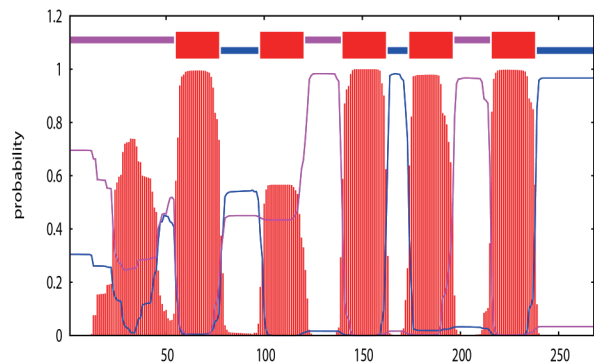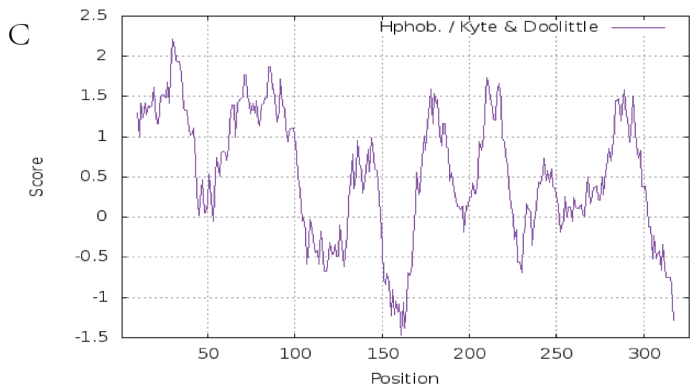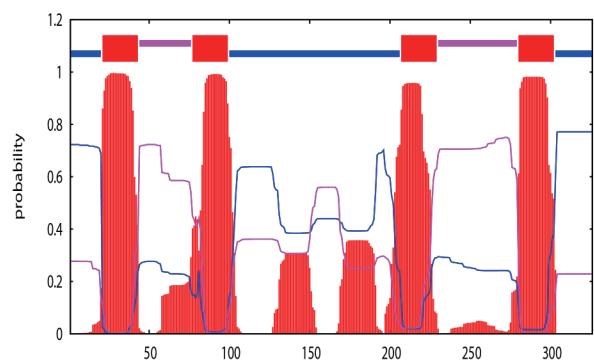

Supplement: Supplemental_Figure_S1.pdf [file Supplemental_Figure_S1.pdf]
